# Supplementary material for: Impact of COVID-19 on the utilisation of maternal and child health services in Peru at national and subnational levels: An interrupted time series analysis
Source: PubMed Central journal article supplement (PMC11659789; doi:10.7189/jogh.14.05039), 2024-12-20
Supplement: jogh-14-05039-s001.pdf [file jogh-14-05039-s001.pdf]

## Supplementary files

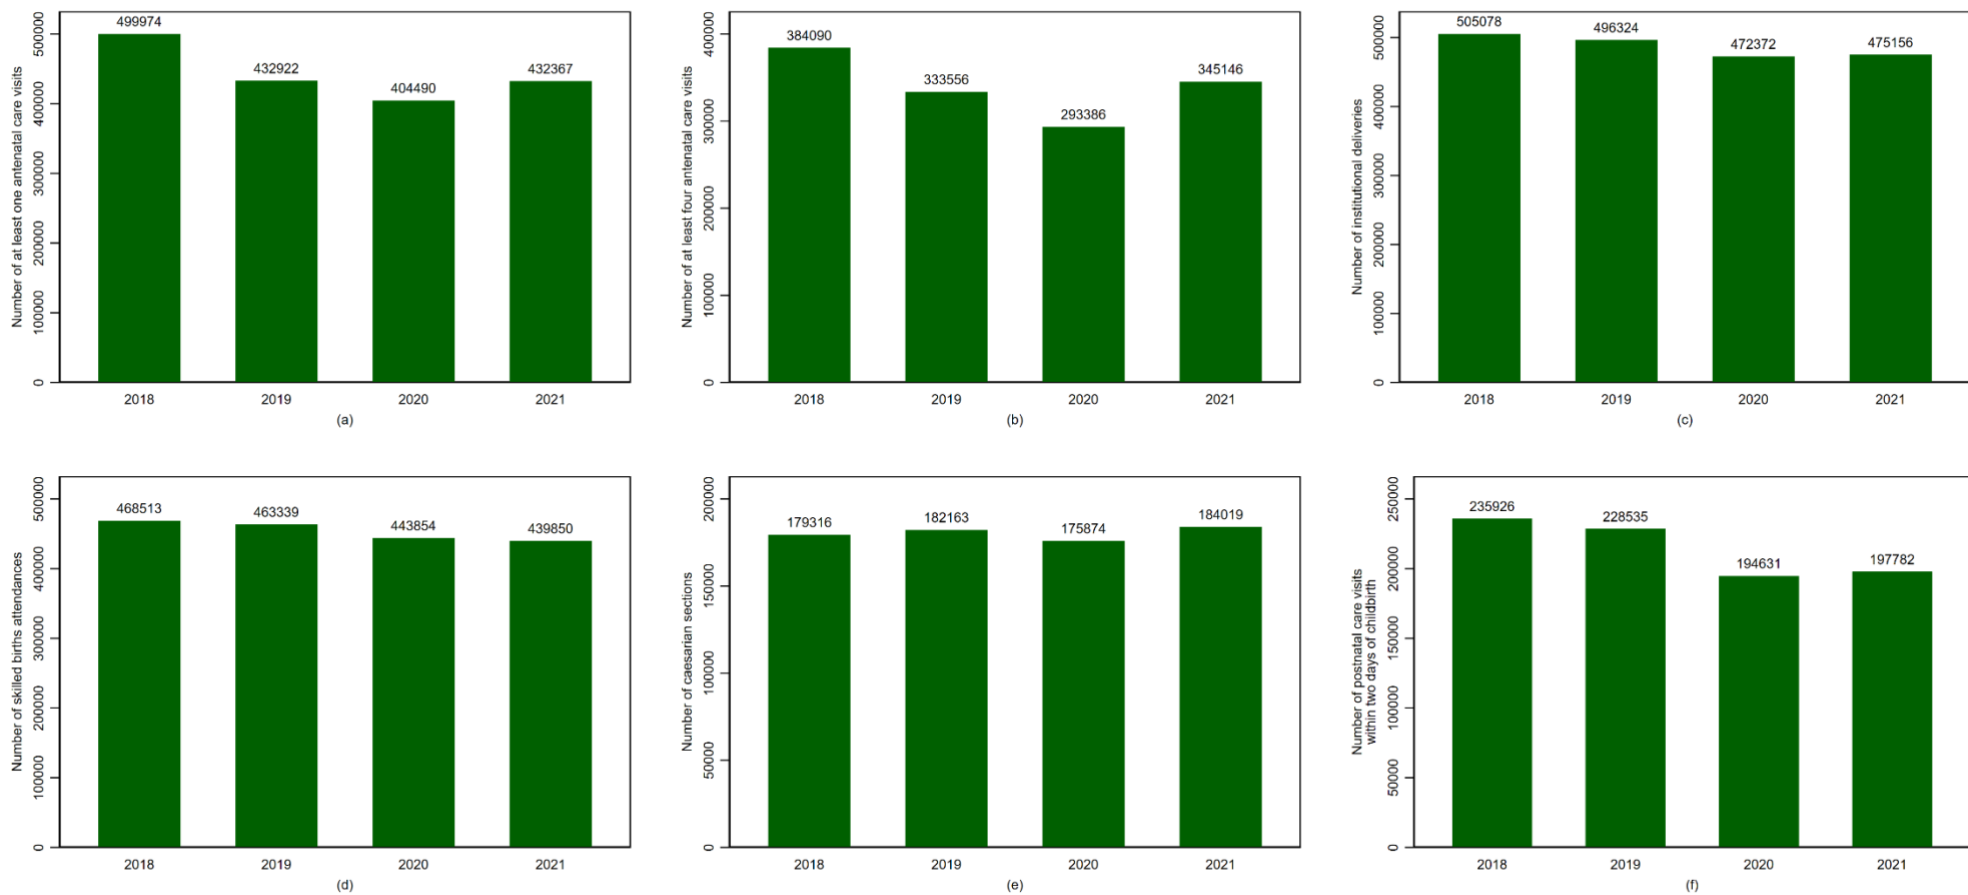

**Figure S1.** Annual national trend of essential maternal and child health services, 2018-2021.

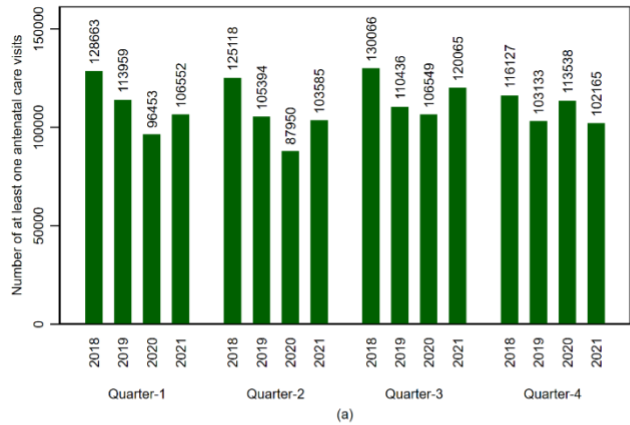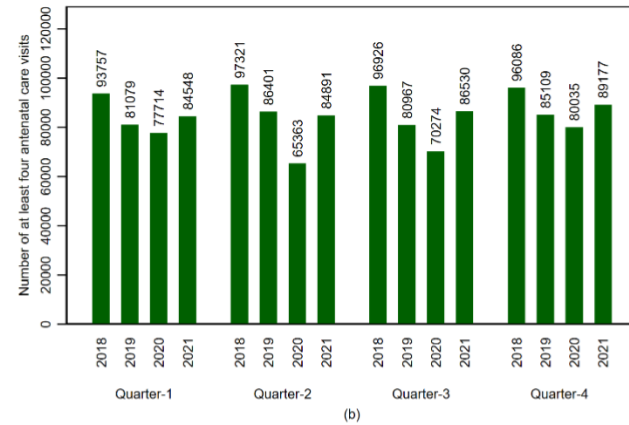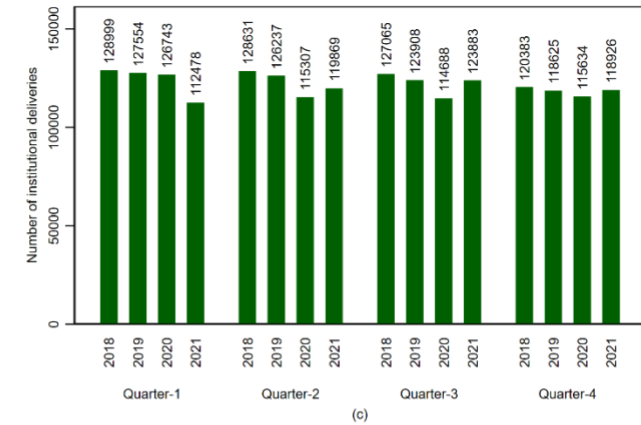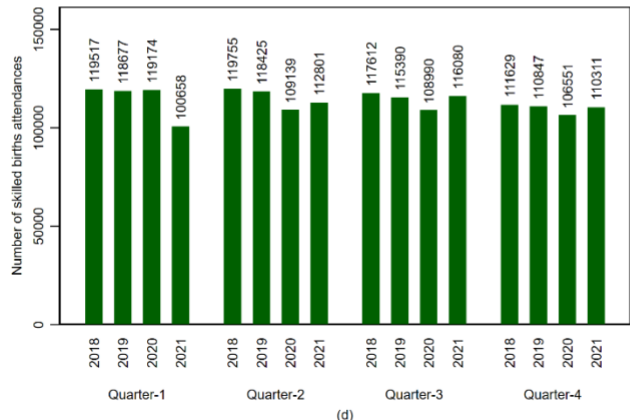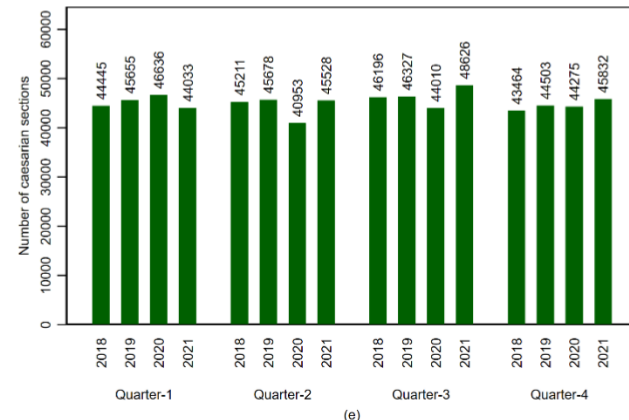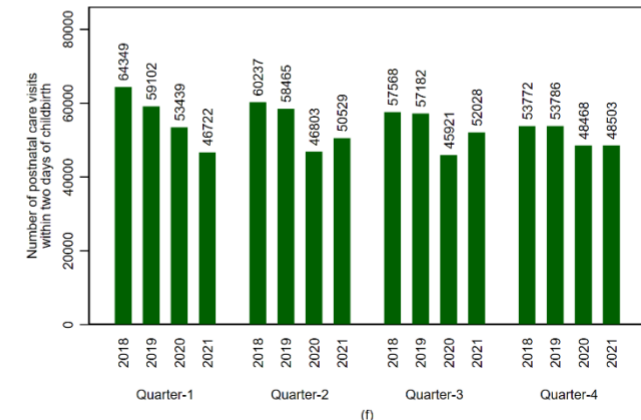

Figure S2. Quarterly national trend of essential maternal and child health services, 2018-2021: Peru.

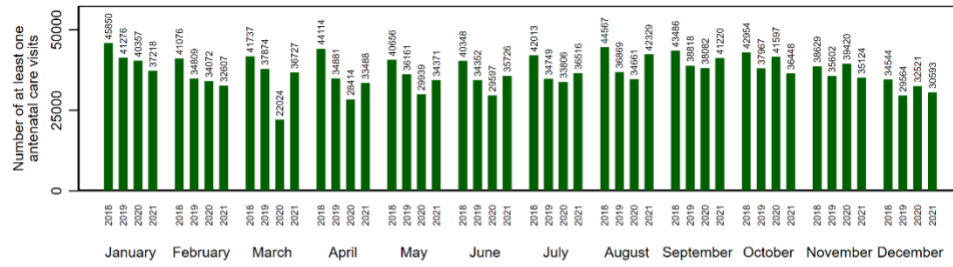

(a)

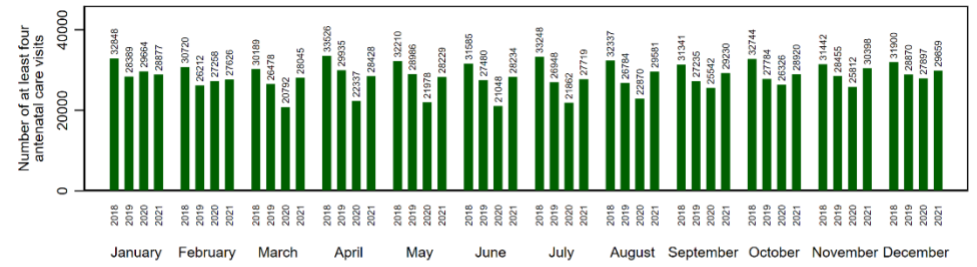

(b)

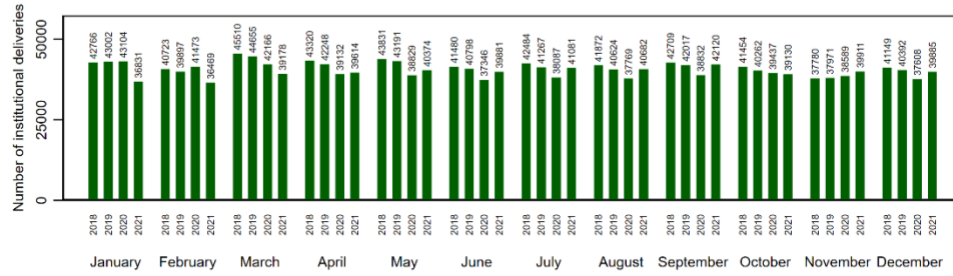

(c)

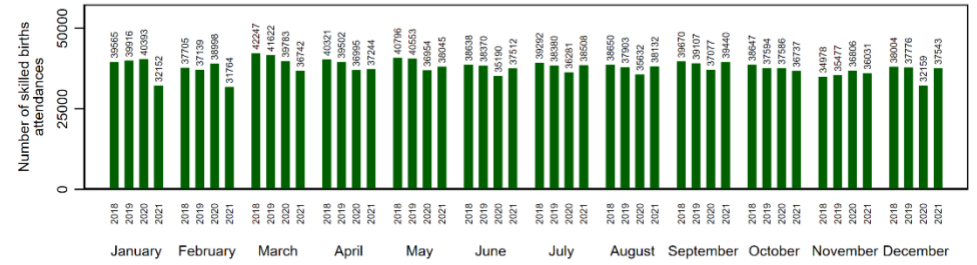

(d)

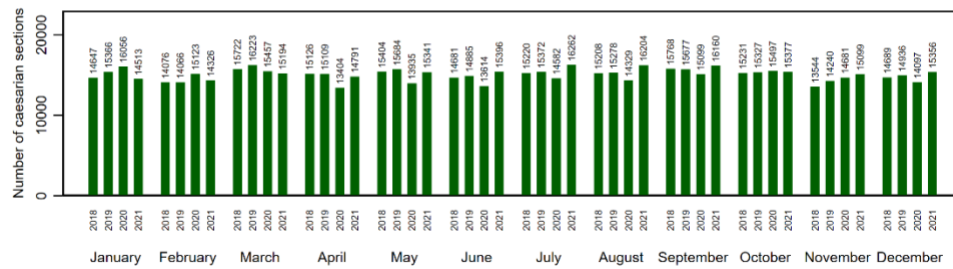

(e)

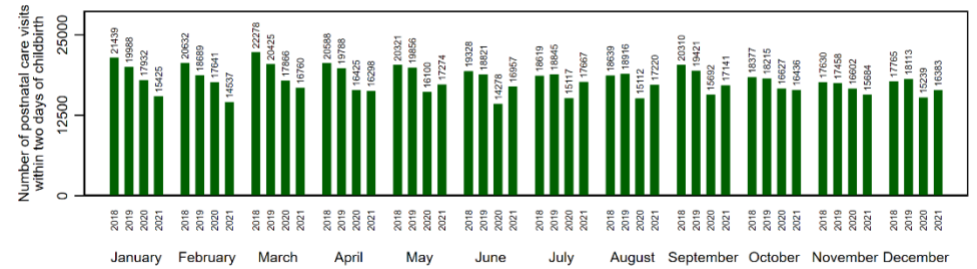

(f)

**Figure S3.** Monthly national trend of essential maternal and child health services, 2018-2021.

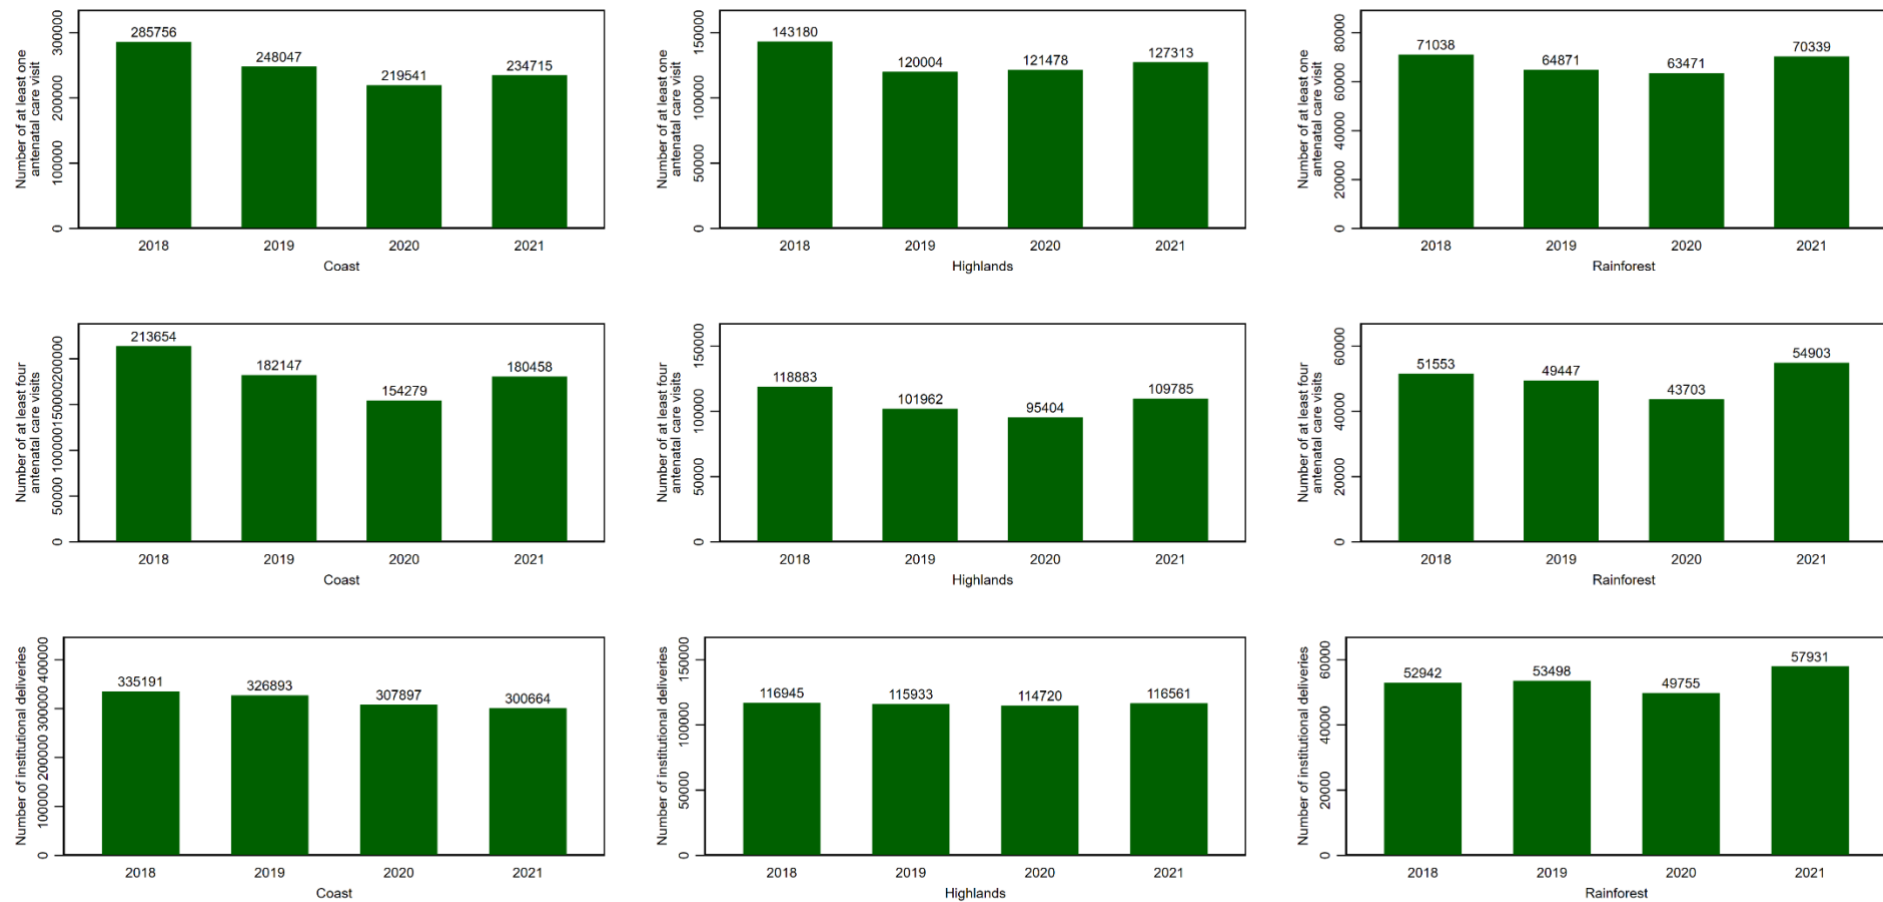

**Figure S4.** Annual trend of essential maternal and child health services by natural region, 2018-2021: Peru.

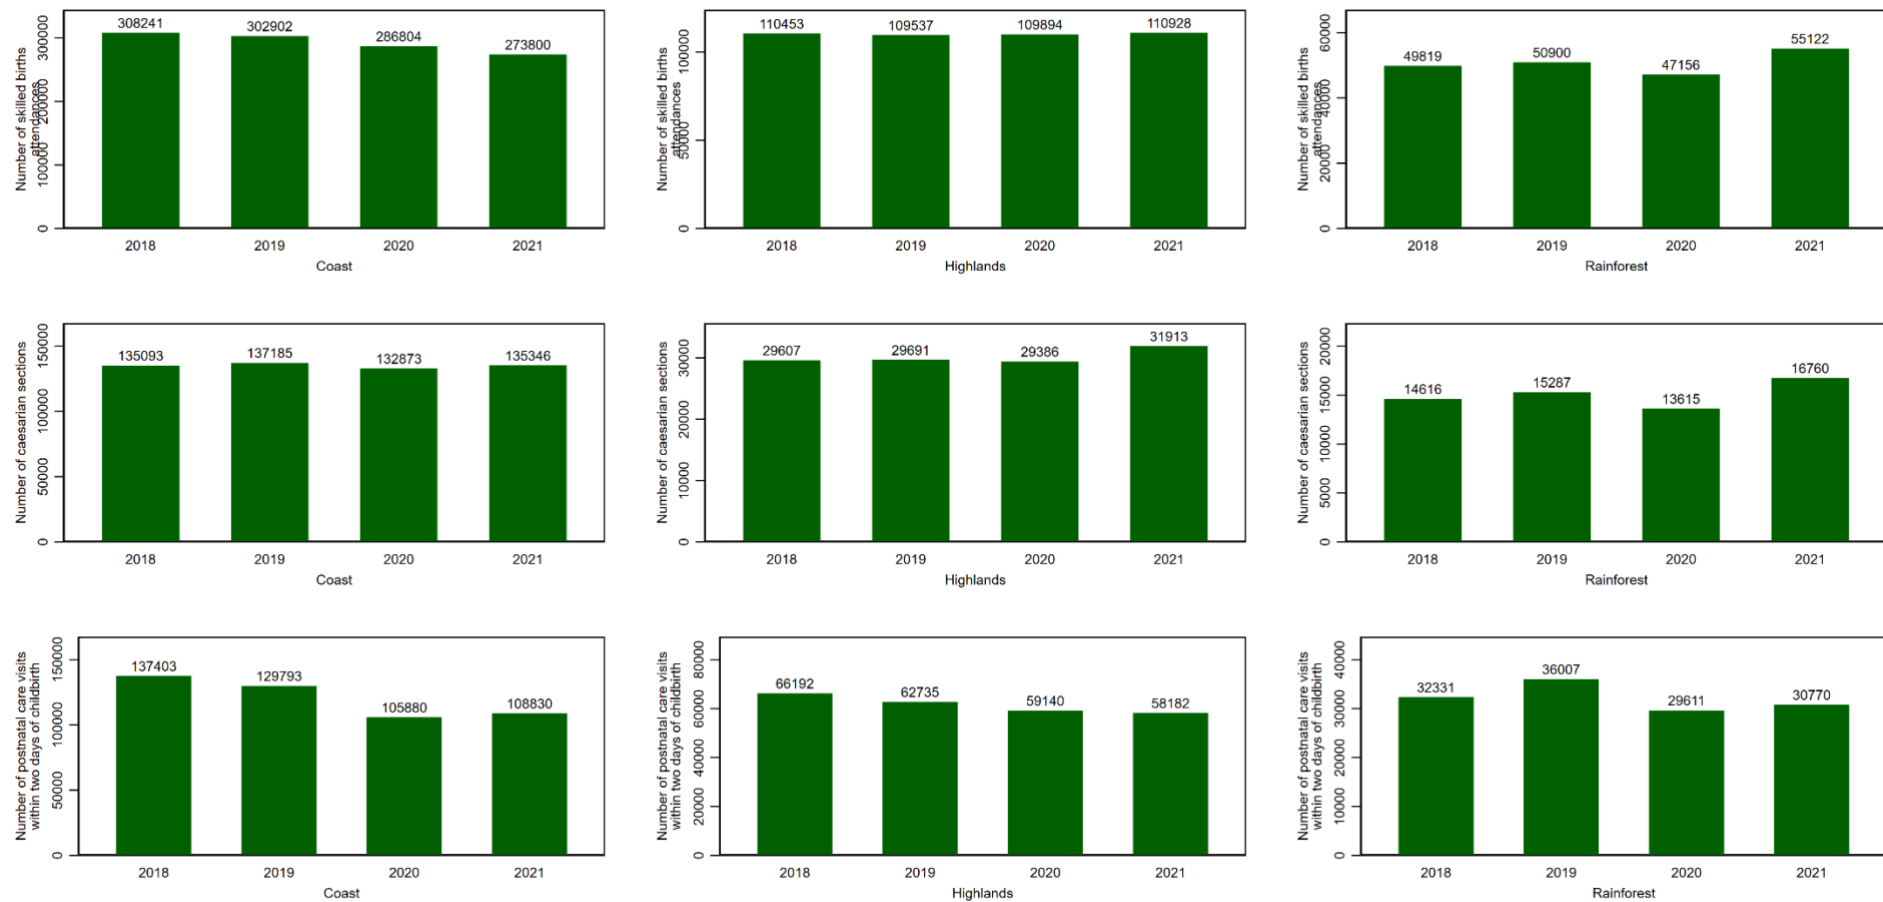

**Figure S5.** Annual trend of essential maternal and child health services by natural region, 2018-2021: Peru.

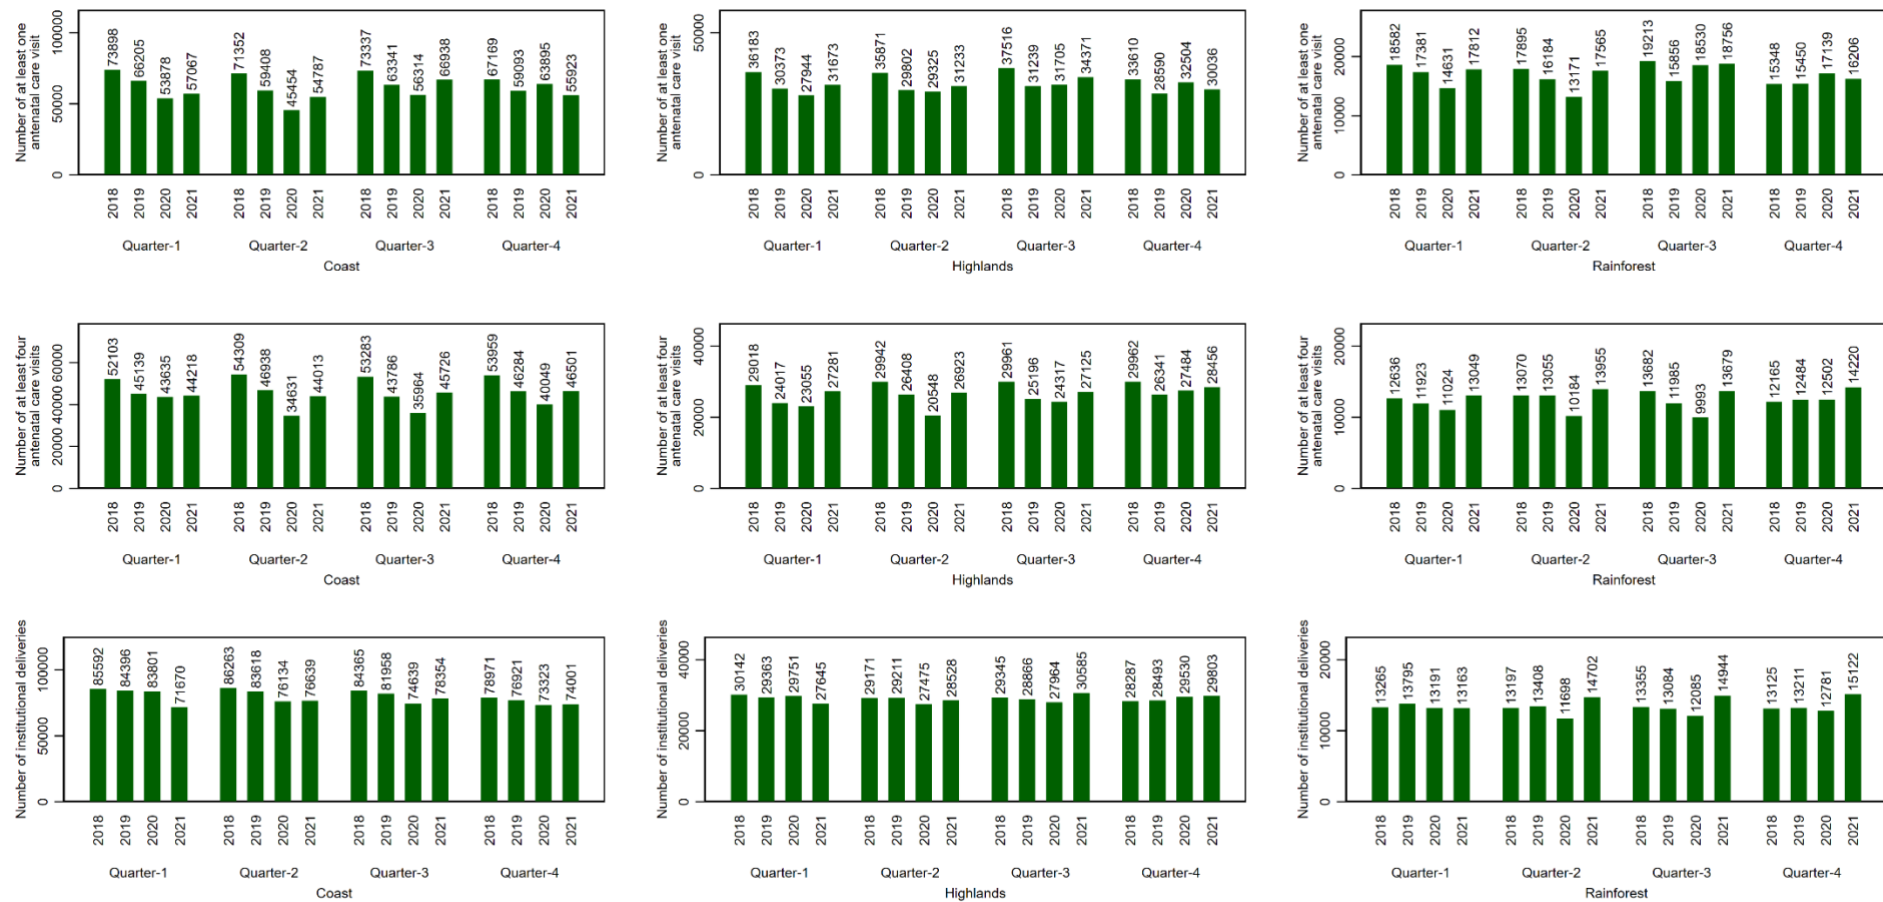

Figure S6. Quarterly trend of essential maternal and child health services by natural region, 2018-2021: Peru.

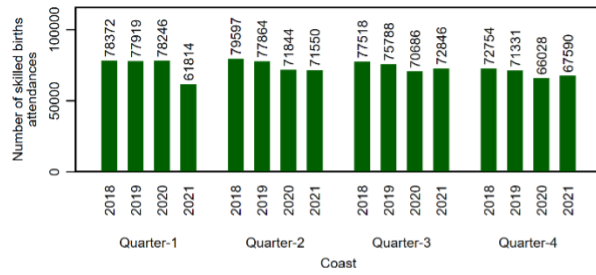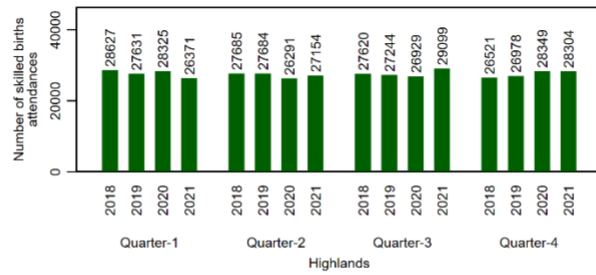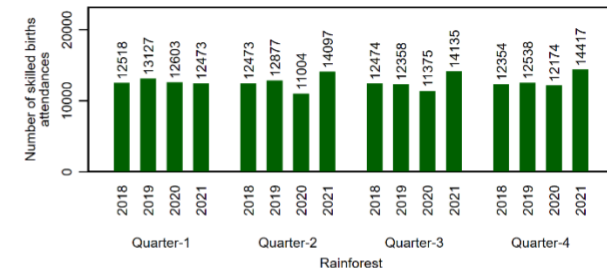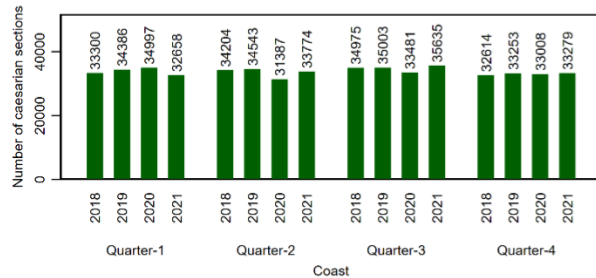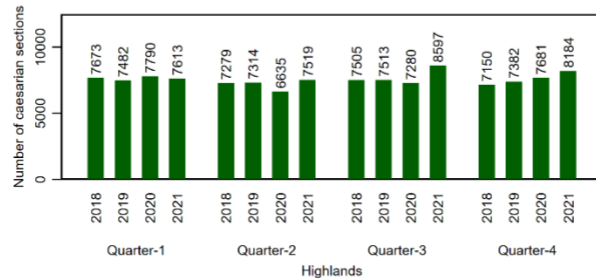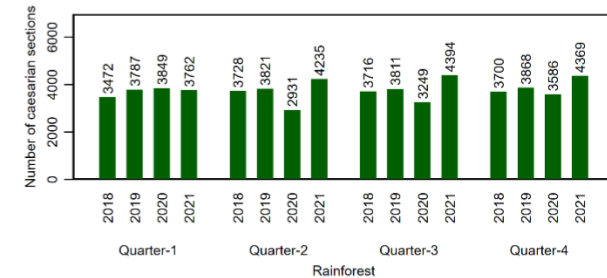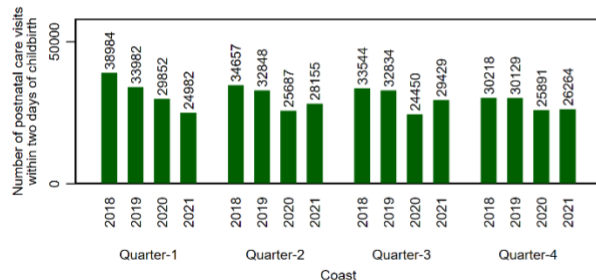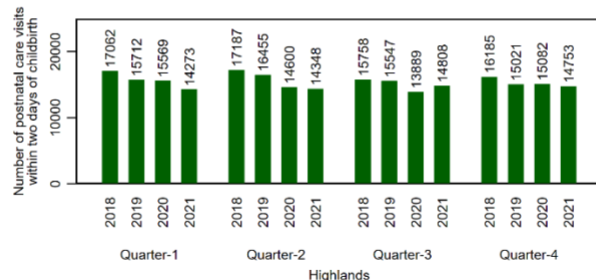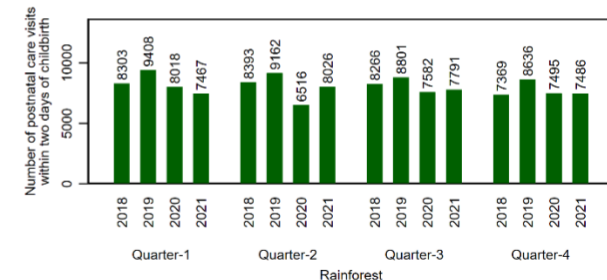

Figure S7. Quarterly trend of essential maternal and child health services by natural region, 2018-2021: Peru.

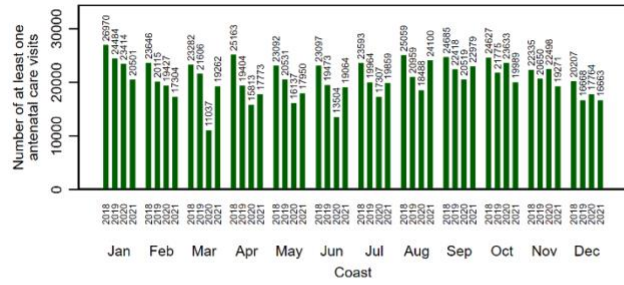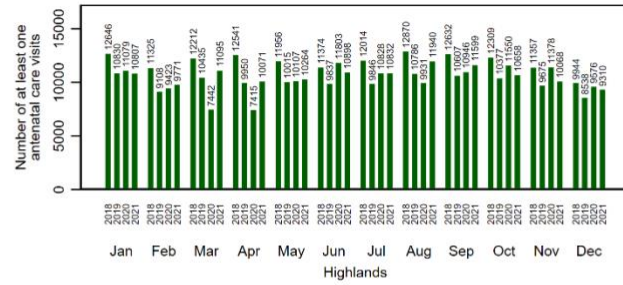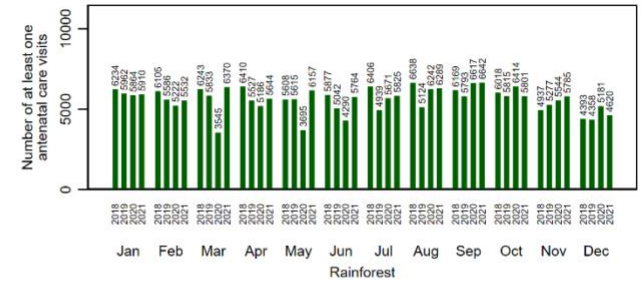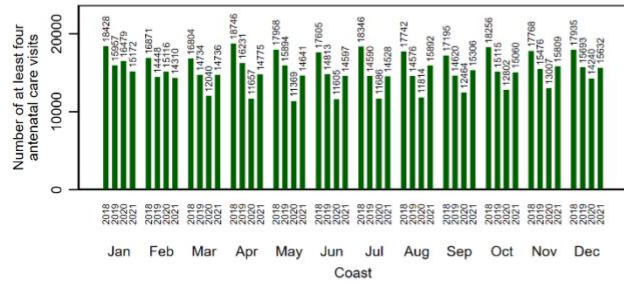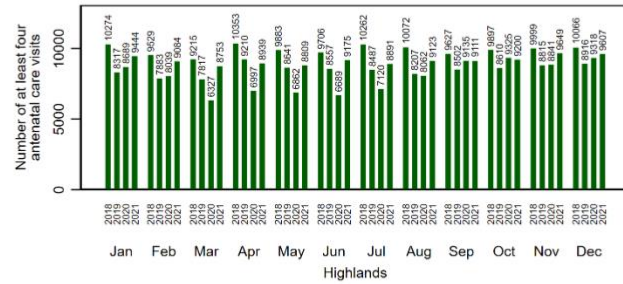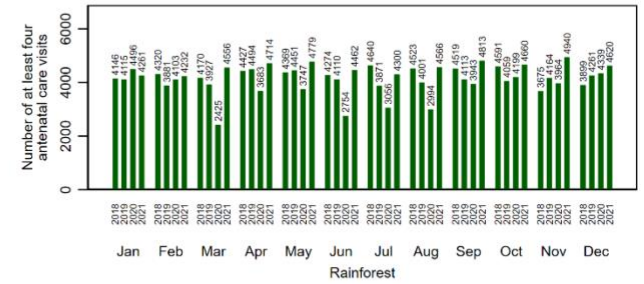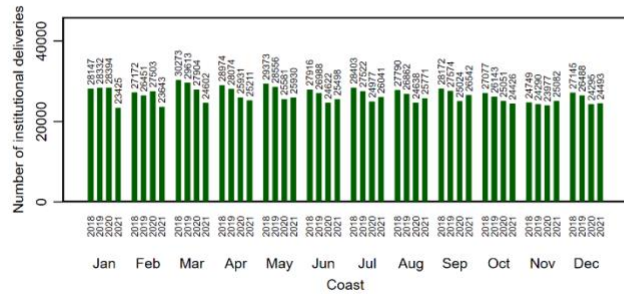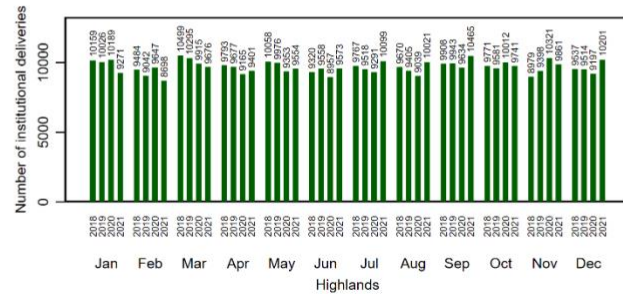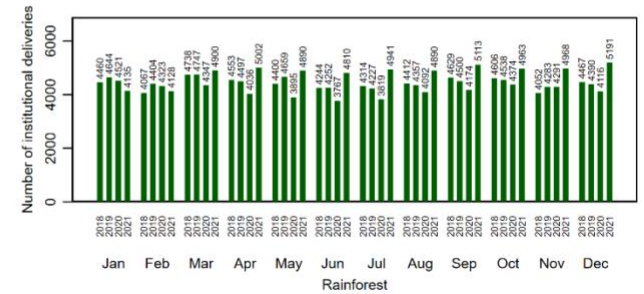

Figure S8. Monthly trend of essential maternal and child health services by natural region 2018-2021: Peru.



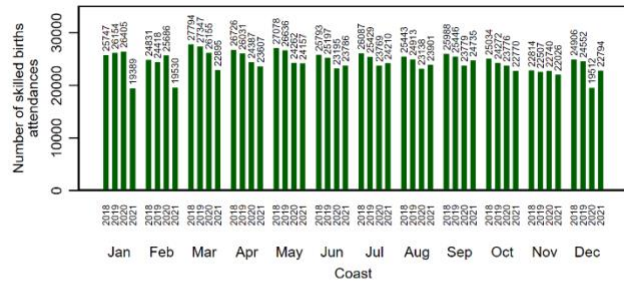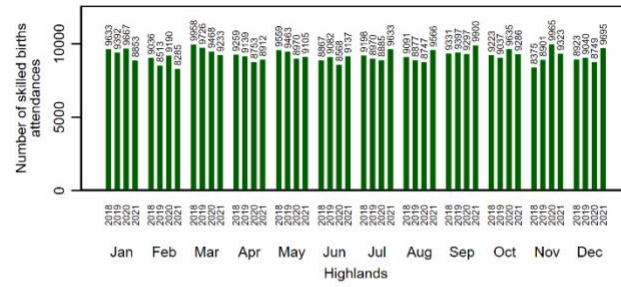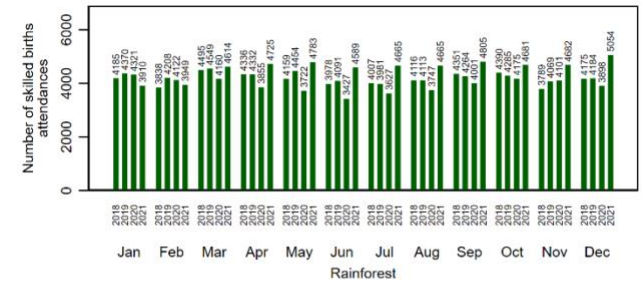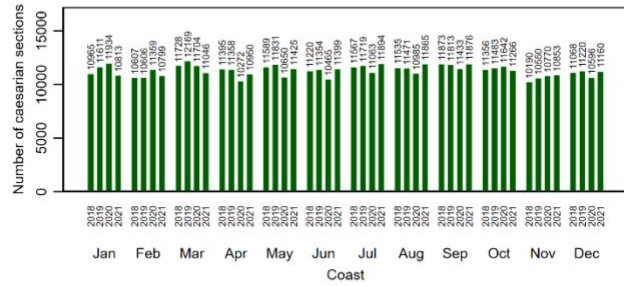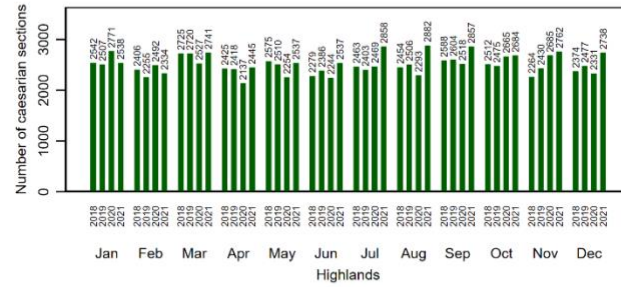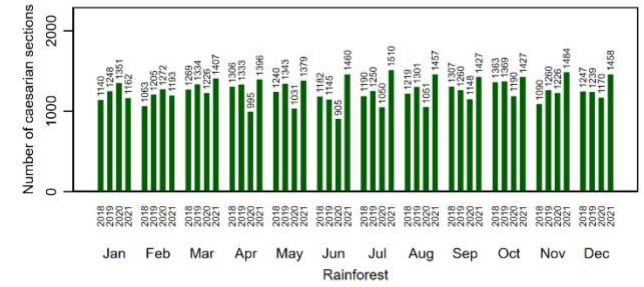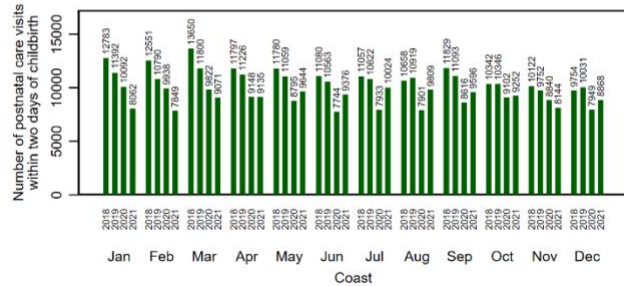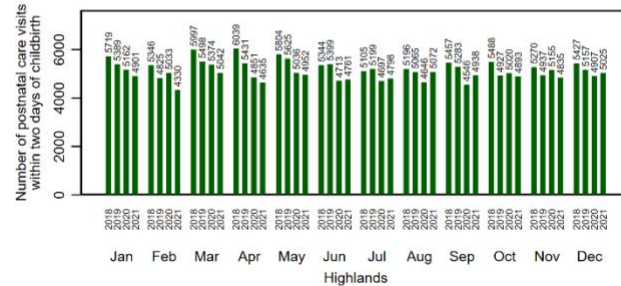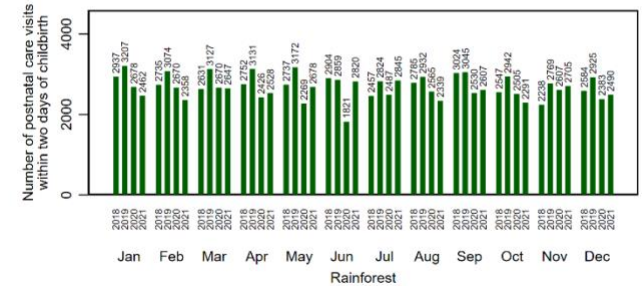

Figure S9. Monthly trend of essential maternal and child health services by natural region 2018-2021: Peru.

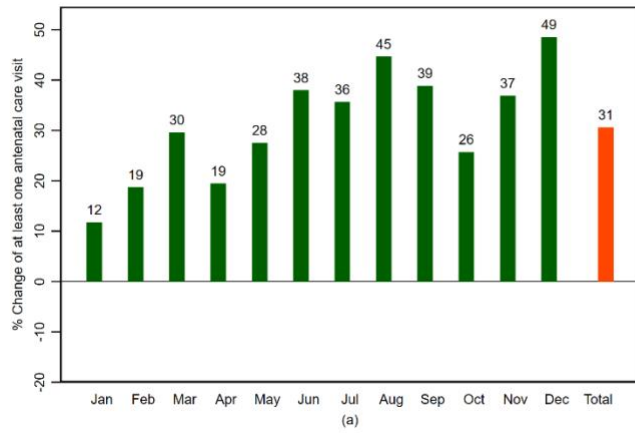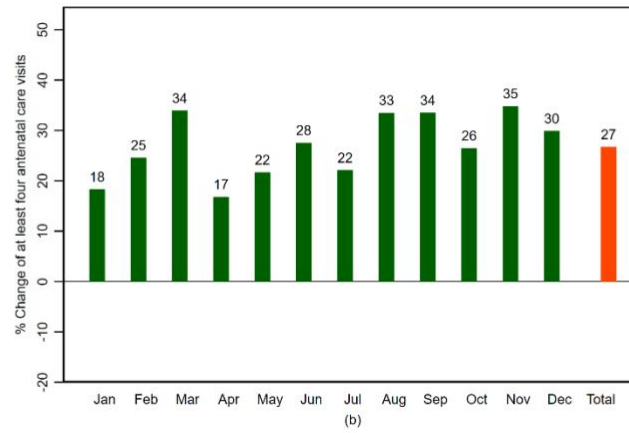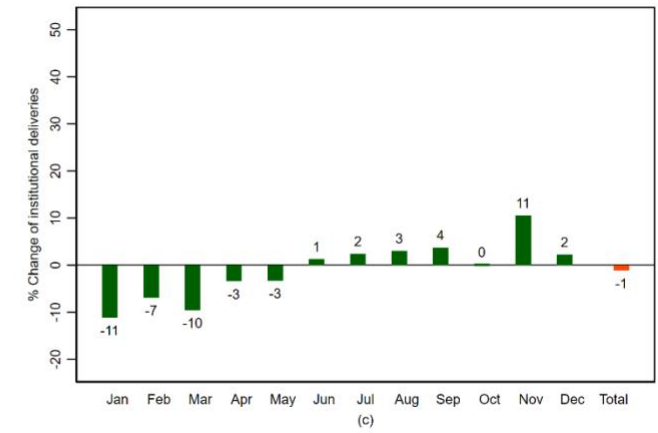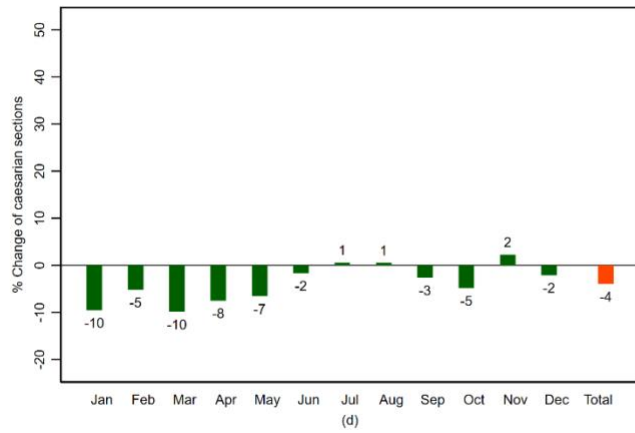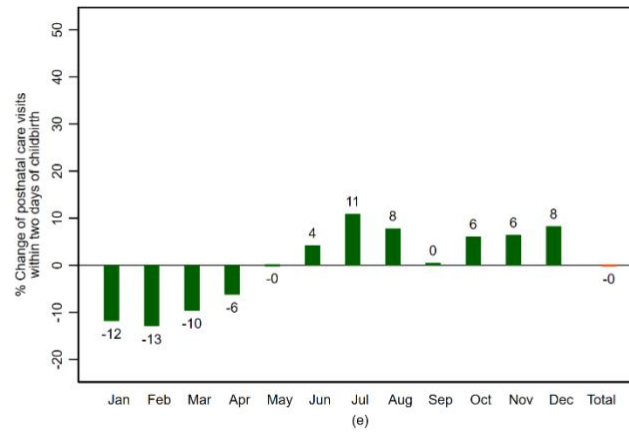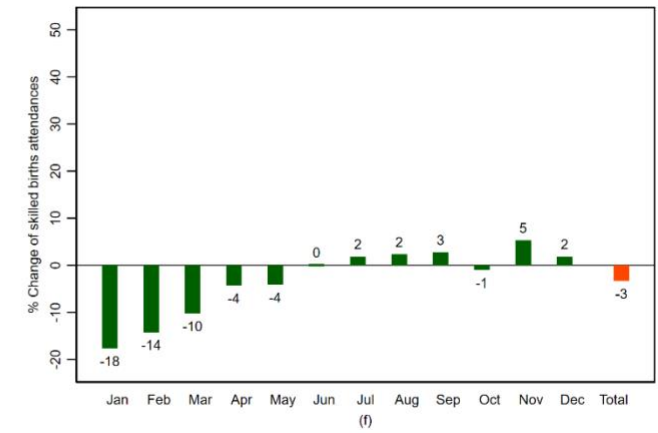

**Figure S10.** Percent change of essential maternal and child health services, national level, 2021. Baseline: average 2018-2019.

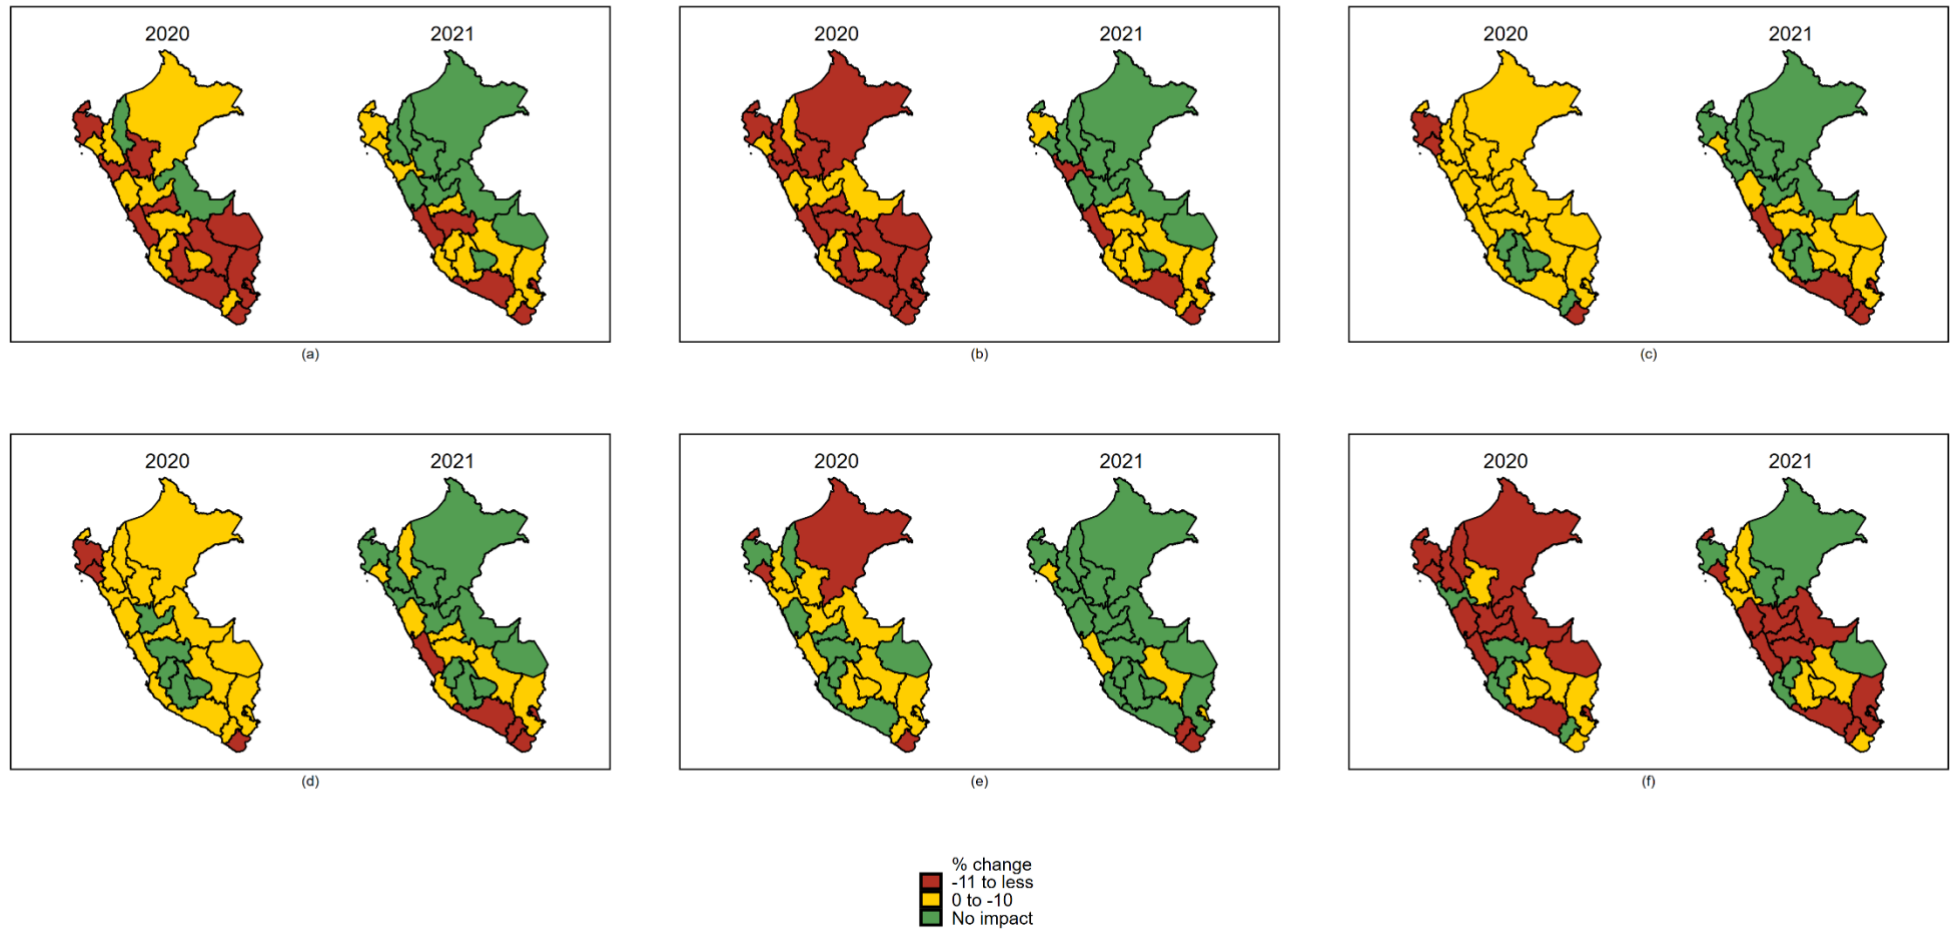

**Figure S11.** Percent change in the number of essential maternal and child health services at departmental level, years 2020 and 2021. Baseline: average 2018 to 2019. a. At least one antenatal care visit; b. At least four antenatal care visits; c. Institutional deliveries; d. Skilled birth attendances; e. Caesarean sections; f. Postnatal control visit within two days of childbirth.
